# Supplementary material for: Changing patterns of fire occurrence in proximity to forest edges, roads and rivers between NW Amazonian countries
Source: Copernicus journal article supplement (doi:10.5194/bg-14-2755-2017), 2017-06-06
Supplement: Supplementary file 1 [file bg-14-2755-2017-supplement.pdf]

Supplement of Biogeosciences, 14, 2755–2765, 2017  
<https://doi.org/10.5194/bg-14-2755-2017-supplement>  
© Author(s) 2017. This work is distributed under  
the Creative Commons Attribution 3.0 License.

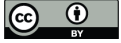

*Supplement of*

## **Changing patterns of fire occurrence in proximity to forest edges, roads and rivers between NW Amazonian countries**

**Dolors Armenteras et al.**

*Correspondence to:* Dolors Armenteras (darmenterasp@unal.edu.co)

The copyright of individual parts of the supplement might differ from the CC BY 3.0 License.

**Supplement 1.** Table S1. Results of the Kolmogorov-Smirnov tests between the observed and the null model for distances of fire occurrences to roads and rivers in each country.

| Country   | Accessibility | D-statistics | p-value |
|-----------|---------------|--------------|---------|
| Brazil    | rivers        | 0.633        | < 0.01  |
| Brazil    | roads         | 0.706        | < 0.01  |
| Colombia  | rivers        | 0.620        | < 0.01  |
| Colombia  | roads         | 0.644        | < 0.01  |
| Ecuador   | rivers        | 0.706        | < 0.01  |
| Ecuador   | roads         | 0.768        | < 0.01  |
| Peru      | rivers        | 0.651        | < 0.01  |
| Peru      | roads         | 0.713        | < 0.01  |
| Venezuela | rivers        | 0.702        | < 0.01  |

**Supplement 2.** Pairwise distances between CFD curves for countries in Figures 4.

Table S2: Distances between CFD curves in Fig. 4A.

|           | Brazil | Colombia | Ecuador | Peru |
|-----------|--------|----------|---------|------|
| Colombia  | 0.01   |          |         |      |
| Ecuador   | 0.39   | 0.38     |         |      |
| Peru      | 0.11   | 0.10     | 0.29    |      |
| Venezuela | 0.21   | 0.20     | 0.20    | 0.10 |

Table S3: Distances between CFD curves in Fig. 4B.

|          | Brazil | Colombia | Ecuador |
|----------|--------|----------|---------|
| Colombia | 0.29   |          |         |
| Ecuador  | 0.20   | 0.30     |         |
| Peru     | 0.09   | 0.23     | 0.15    |

Table S4: Distances between CFD curves in Fig. 4C.

|           | Brazil | Colombia | Ecuador | Peru |
|-----------|--------|----------|---------|------|
| Colombia  | 0.03   |          |         |      |
| Ecuador   | 0.08   | 0.06     |         |      |
| Peru      | 0.03   | 0.01     | 0.05    |      |
| Venezuela | 0.03   | 0.01     | 0.07    | 0.02 |

Table S5: Distances between CFD curves in Fig. 4D.

|          | Brazil | Colombia | Ecuador |
|----------|--------|----------|---------|
| Colombia | 0.15   |          |         |
| Ecuador  | 0.48   | 0.40     |         |
| Peru     | 0.32   | 0.24     | 0.21    |

**Supplement 3. Table S6.** Results of the Kolmogorov-Smirnov tests between the observed and the null model for distances of fire occurrence to forest edge (outside or inside the forest) in each country.

| Country   | Forest edge        | D-statistics | p-value |
|-----------|--------------------|--------------|---------|
| Brazil    | outside the forest | 0.969        | < 0.01  |
| Brazil    | inside the forest  | 0.801        | < 0.01  |
| Colombia  | outside the forest | 0.938        | < 0.01  |
| Colombia  | inside the forest  | 0.768        | < 0.01  |
| Ecuador   | outside the forest | 0.978        | < 0.01  |
| Ecuador   | inside the forest  | 0.705        | < 0.01  |
| Peru      | outside the forest | 0.940        | < 0.01  |
| Peru      | inside the forest  | 0.687        | < 0.01  |
| Venezuela | outside the forest | 0.927        | < 0.01  |
| Venezuela | inside the forest  | 0.737        | < 0.01  |
